1           **TLR2 signaling pathway combats *Streptococcus uberis* infection by**  
2           **inducing production of mitochondrial reactive oxygen species**

3    Bin Li<sup>1#</sup>, Zhixin Wan<sup>1#</sup>, Zhenglei Wang<sup>1</sup>, Jiakun Zuo<sup>1,2</sup>, Yuanyuan Xu<sup>1</sup>, Xianghan Han<sup>2</sup>, Vanhnaseng  
4    Phouthapane<sup>3</sup>, Jinfeng Miao<sup>1\*</sup>

5    <sup>1</sup> MOE Joint International Research Laboratory of Animal Health and Food Safety, College of  
6    Veterinary Medicine, Nanjing Agricultural University, Nanjing 210095, China

7    <sup>2</sup> Shanghai Veterinary Research Institute, Chinese Academy of Agricultural Sciences, Shanghai,  
8    200241, China

9    <sup>3</sup> Biotechnology and Ecology Institute, Ministry of Science and Technology (MOST), Vientiane  
10   22797, Lao PDR

11   \* Corresponding author. Fax: +86 25 84398669. E-mail address: mjf171647@126.com

12   # These authors contributed equally (Bin Li, Zhixin Wan).

13

14   **Abstract**

15   Mastitis caused by *Streptococcus uberis* is a hazardous clinical disease in dairy  
16   animals. In this study, the role of Toll-like receptors (TLRs) and TLR-mediated  
17   signaling pathways in mastitis caused by *S. uberis* was investigated using mouse  
18   models and mammary epithelial cells (MECs). We used *S. uberis* to infect mammary  
19   glands of wild type, TLR2<sup>-/-</sup> and TLR4<sup>-/-</sup> mice and quantified the adaptor molecules in  
20   TLR signaling pathways, proinflammatory cytokines, tissue damage and bacterial  
21   count in mammary glands. When compared with TLR4 deficiency, TLR2 deficiency  
22   induced more severe pathological changes through myeloid differentiation primary

23 response 88 (MyD88)-mediated signaling pathways during *S. uberis* infection. In  
24 MECs, TLR2 detected *S. uberis* infection and induced mitochondrial reactive oxygen  
25 species (mROS) to assist host control of secretion of inflammatory factors and  
26 elimination of intracellular *S. uberis*. Our results demonstrate that TLR2-mediated  
27 mROS have a significant effect on *S. uberis*-induced host defense responses in  
28 mammary glands as well as MECs.

29

### 30 **Author summary**

31 *S. uberis* contributes significantly to global mastitis and remains a major obstacle for  
32 inflammation elimination due to its ability to form persistent infection in mammary  
33 tissue. The Toll-like receptor (TLR) family plays a significant role in identifying  
34 infections of intracellular bacteria and further triggering inflammatory reactions in  
35 immune cells. However, the detailed molecular mechanism by which TLR is regulated,  
36 and whether MECs, as the main cells in mammary gland, are tightly involved in these  
37 processes is poorly understood. Here, we used *S. uberis* to infect mammary glands of  
38 wild type, TLR2<sup>-/-</sup>, TLR4<sup>-/-</sup> mice and MECs to assess pathogenesis, proinflammatory  
39 cytokines, ROS as well as mROS levels during infection. We found that during *S.uberis*  
40 infection, it is TLR2 deficiency that induced more severe pathological changes  
41 through MyD88-mediated signaling pathways. In addition, our work demonstrates  
42 that mROS mediated by TLR2 has an important role in host defense response to  
43 combat *S. uberis* infection in mammary glands as well as MECs.

44

## 45 Introduction

46 Mastitis is a type of inflammation mainly caused by intramammary infection and  
47 causes great harm to the dairy industry [1]. *Streptococcus uberis* is an environmental  
48 pathogen that is emerging as the most important mastitis-causing agent in some  
49 regions [2]. Previous studies in our laboratory have demonstrated that persistent  
50 inflammation including swelling, secretory epithelial cell degeneration, and  
51 polymorphonuclear neutrophilic leukocyte (PMN) infiltration occurs in mammary  
52 tissue following injection with *S. uberis* [3]. The inflammatory response caused by  
53 *S. uberis* is lighter than that caused by *E. coli* [3]. These pathological response  
54 connected with intracellular infection of *S. uberis* as it escaped the elimination of  
55 immune cells and formed persistent infection.

56 Activation of pattern recognition receptors (PRRs) to produce natural  
57 inflammatory immune response is important to control the intracellular infection  
58 induced by bacteria like *S. uberis* [4]. TLR family plays a critical role in these processes.  
59 Upon activation by microbes, the MyD88-dependent pathway triggers production of  
60 inflammatory cytokines through activation of nuclear factor (NF)- $\kappa$ B and  
61 mitogen-activated protein kinases, and/or a TIR-domain-containing adapter-inducing  
62 interferon (IFN)- $\beta$  (TRIF)-dependent pathway associated with induction of IFNs and  
63 stimulation of T cell responses [5]. Previous research has found that PRRs are not  
64 only expressed by immune cells, but also in conventional non-immune cells, for  
65 example, endothelial and epithelial cells, which also contribute to immune regulation  
66 [6].

67 Strandberg et al. demonstrated for the first time in 2005 that TLRs and their  
68 downstream molecules are expressed on bovine MECs [6]. Ibeagha-Awemu et al.  
69 further demonstrated that expression of TLR4, MyD88, NF- $\kappa$ B, TIR domain-containing  
70 adapter molecule 2 (TICAM2) and IFN-regulatory factor 3 increased in bovine MECs  
71 challenged by lipopolysaccharide [7]. These studies announced that MECs might  
72 have a pivotal role in host defense with TLRs for their huge number in the mammary  
73 gland. Our laboratory did a lot of work on the function of TLRs and MECs in  
74 eliminating *S. uberis* infection *in vivo* and *in vitro* models. We found that TLRs, mainly  
75 TLR2 but not excluding TLR4, initiated a complex signaling network characterized  
76 by NF- $\kappa$ B and nuclear factor of activated T cells. In addition, they activated the  
77 secretion of cytokines and chemokines accompanied with their self-regulation  
78 pathways in response to *S. uberis* challenge.

79 Reactive oxygen species (ROS) are free radicals that contain oxygen atoms,  
80 including hydrogen peroxide ( $H_2O_2$ ), superoxide anion ( $O^{2-}$ ) and hydroxyl radical  
81 ( $OH^-$ ) [8]. They are produced intracellularly through multiple mechanisms depending  
82 on the cell and tissue types. However, the two major sources in mammalian cells are  
83 membrane-associated NADPH oxidase-induced and the mitochondria [9]. It has been  
84 reported that, in most tissues, mROS from the respiratory chain are important [10].  
85 Mitochondria function as a defense against bacterial infection in innate immunity,  
86 mainly through mROS, which is demonstrated by the fact that mROS modulate  
87 several signaling pathways, including NF- $\kappa$ B, C-Jun N-terminal kinase and the  
88 caspase-1 inflammasome [11]. Previous studies have shown that restriction of

89 pathogen-induced mROS impairs NF- $\kappa$ B activation, suggesting that mROS positively  
90 control the NF- $\kappa$ B signaling pathway [12, 13]. In addition, the production of mROS in  
91 immune cells (e.g. macrophages) involves recruitment of tumor necrosis factor (TNF)  
92 receptor-associated factor (TRAF)6 to mitochondria, which also acts as an adaptor of  
93 the TLR signaling pathway [14]. MECs are the main cells for lactation in mammary  
94 tissue. In recent years, they have also been found to play a non-negligible role in the  
95 regulation of infection. Pathogens invading mammary tissue and epithelial cells can  
96 stimulate MECs to produce proinflammatory cytokines, anti-inflammatory factors  
97 and chemokines such as TNF- $\alpha$ , interleukin (IL)-1 $\beta$ , IL-4, IL-6, IL-8 and IL-10 [15]. It is  
98 possible that MECs are also involved in the generation of ROS in infection. However,  
99 few studies have investigated the interaction between TLRs and mROS against  
100 *S. uberis* infection *in vitro* and *in vivo*. Therefore, we investigated whether the  
101 process of TLR induction of mROS production plays an important role against  
102 *S. uberis* infection in host and MECs.

103

## 104 **Results**

### 105 **TLR2 mediates tissue damage and anti-*S. uberis* infection in mammary glands**

106 *S. uberis* belongs to gram-positive bacteria which is mainly recognized by TLR2.  
107 However, previous research had demonstrated that the role of TLR4 could not be  
108 ignored in *S. uberis* infection for their close relationship, similar structure and  
109 function [16, 17]. In this work, we explored the role of TLR2 and TLR4 in *S. uberis*  
110 infection in TLR2<sup>-/-</sup> and TLR4<sup>-/-</sup> mice to understand further the molecular defence

111 mechanisms in *S. uberis* mastitis. No histological changes were observed in WT-B6 or  
112 WT-B10 mammary glands of control mice, whereas, there was some suspicion of  
113 tissue damage in TLR2<sup>-/-</sup> and TLR4<sup>-/-</sup> control mice (Fig 1A). Inflammation and tissue  
114 damage appeared in mammary tissue after infection with *S. uberis* in all challenged  
115 groups. This response was characterized by PMN infiltration, increased bleeding and  
116 epithelial cell degeneration, and excess adipose tissue. Compared with WT-B6 mice,  
117 TLR2 deficiency induced more severe pathological damage. A higher score was  
118 present for the three indexes mentioned above and there were significant increases  
119 in bleeding and degeneration, and excess adipose tissue ( $P < 0.05$ ; Fig 1B). However,  
120 TLR4 deficiency caused no inflammation and tissue damage during *S. uberis*  
121 challenge (Fig 1A and 1C).

122 NAGase, a marker enzyme of MECs and mammary gland damage, was significantly  
123 elevated in TLR2<sup>-/-</sup> mice, but not in TLR4<sup>-/-</sup> mice when compared with WT mice at 24  
124 h post-challenge ( $P < 0.05$ ; Fig 1D). Similarly, the bacterial numbers were higher in  
125 the mammary tissue of TLR2<sup>-/-</sup> mice than in WT-B6 mice ( $P < 0.05$ ) but there was no  
126 significant difference between TLR4<sup>-/-</sup> and WT-B10 mice. We conclude that TLR2  
127 primarily mediated the tissue damage and antibacterial effect in mammary glands  
128 during *S. uberis* infection.

129

### 130 **TLR2 and TLR4 deficiency affect secretion of cytokines in *S.uberis* infection**

131 The secretion of proinflammatory cytokines in mammary glands which better  
132 reflects the level of inflammation have been reported previously [18, 19]. However,

133 the massive release of cytokines can cause irreversible damage to tissues. Here, we  
134 investigated the role of TNF- $\alpha$ , IL-1 $\beta$  and IL-6 in response to *S. uberis* infection in  
135 TLR2<sup>-/-</sup> and TLR4<sup>-/-</sup> mice (Fig 2A and 2B). *S. uberis* challenge increased TNF- $\alpha$  level  
136 significantly in WT, TLR2<sup>-/-</sup> and TLR4<sup>-/-</sup> mice ( $P < 0.05$ ). Compared with  
137 corresponding WT mice, TNF- $\alpha$  and IL-1 $\beta$  in TLR2<sup>-/-</sup> mice and TNF- $\alpha$  in TLR4<sup>-/-</sup> mice  
138 significantly decreased ( $P < 0.05$ ). These results indicate that TLR2 and TLR4  
139 deficiency affected secretion of cytokines in *S.uberis* infection.

140

#### 141 **MyD88-dependent pathway predominates in *S. uberis* infection**

142 MyD88 dependent and independent pathways are vital in host's response after TLRs  
143 activated [20, 21]. We assessed the expression of MyD88 and TRIF respectively by  
144 immunohistochemistry in mammary glands, which are the key molecules of the  
145 MyD88-dependent or independent signaling pathways. There was a significant  
146 increase in MyD88 but not TRIF expression in WT, TLR2<sup>-/-</sup> and TLR4<sup>-/-</sup> mice ( $P < 0.05$ ).  
147 Lower levels of MyD88 were observed in TLR2<sup>-/-</sup> and TLR4<sup>-/-</sup> mice compared with  
148 WT mice ( $P < 0.05$ ; Fig 3A and 3B). As the main functional cells in mammary glands,  
149 our former study had established that MECs played a key role in anti-infection  
150 response in mammary glands. We also detected that interference of TLR2 and/or  
151 TLR4 by specific siRNA significantly decreased MyD88 expression in *S. uberis*  
152 infection ( $P < 0.05$ ; Fig 3C, 3D and 3E). These data suggest that the  
153 MyD88-dependent pathway predominates in *S. uberis* infection in MECs and in  
154 mammary glands following TLR activation.

155

156 **TRAF6 and ECSIT participate in signal sensing from TLRs in *S. uberis* infection**

157 We next evaluated the level of TRAF6 and ECSIT, which are downstream targets of  
158 the MyD88 signaling pathway, using immunohistochemistry in mammary glands of  
159 mice. The adaptors TRAF6 and ECSIT increased dramatically in all mice after *S. uberis*  
160 infection ( $P < 0.05$ ), although TLR2 or TLR4 deletion weakened expression of ECSIT in  
161 WT compared with TLR2<sup>-/-</sup> and TLR4<sup>-/-</sup> mice ( $P < 0.05$ ; Fig 4A and 4B). In MECs,  
162 interference of TLR2 or TLR4 significantly reduced expression of TRAF6 and ECSIT  
163 after *S. uberis* infection ( $P < 0.05$ ; Fig 4C, 4D and 4E). TRAF6 and ECSIT expression did  
164 not differ between TLR2<sup>-/-</sup> and TLR4<sup>-/-</sup> mice. The results confirm that TRAF6 and  
165 ECSIT downstream of the MYD88 pathway mediate the anti-*S. uberis* response in  
166 mice and MECs.

167

168 **TLRs mediate redox status of mammary glands during *S. uberis* infection**

169 TRAF6 activated by TLRs transfers from the cytoplasm to mitochondria, where it  
170 engages ECSIT to produce mROS, which induces cellular anti-bacterial response [22].  
171 Since the level of ROS in tissue cannot be detected well, we analyzed T-AOC, SOD,  
172 MDA and UCP2 in mammary glands to reflect indirectly the antioxidant levels. The  
173 levels of MDA and UCP2 were significantly increased due to the infection of *S. uberis*  
174 in WT and TLR2<sup>-/-</sup> and TLR4<sup>-/-</sup> ( $P < 0.05$ ; Fig 5A and 5B). There was no obvious  
175 distinction between TLR2<sup>-/-</sup>, TLR4<sup>-/-</sup> and WT mice ( $P > 0.05$ ). T-AOC was significantly  
176 lower in all groups of mice after *S. uberis* challenge ( $P < 0.05$ ). Deletion of TLR4



177 rather than TLR2 significantly decreased SOD activity after *S. uberis* infection ( $P <$   
178 0.05). These results indicate that the host's oxidation level does change after  
179 *S. uberis* infection and these changes are related to the TLR signaling pathway.

180 We aimed to clarify whether MECs were involved in the change in redox status  
181 and had a crucial role in *S. uberis* infection after activation of the TLR signaling  
182 pathway. We interfered with the expression of TLR2 and/or TLR4 in EpH<sub>4</sub>-Ev cells and  
183 detected ROS, mROS and UCP2 levels. *S. uberis* infection caused a significant increase  
184 in ROS and mROS (Fig 5C and 5D). Special targeting of siRNA to TLR2 significantly  
185 reduced the level of ROS and mROS ( $P < 0.05$ ). SiTLR4 decreased their levels to some  
186 extent, but no significant difference was observed ( $P > 0.05$ ). Expression of UCP2  
187 decreased, and interference with siTLR2 reversed this change ( $P < 0.05$ ). Taken  
188 together, these results demonstrate that infection with *S. uberis* changed the redox  
189 status of mammary glands and MECs, and TLR2 played an essential role in this  
190 process, especially in MECs.

191

### 192 **mROS play an important role against *S. uberis* infection in MECs**

193 GKT137831, a specific inhibitor of NADPH oxidase 1 (NOX1) and NOX4; and NG25, an  
194 inhibitor of TAK1 [23, 24], were used to suppress ROS generation from NOX  
195 complexes and to down-regulate production of proinflammatory cytokines,  
196 respectively. GKT137831 and NG25, simultaneously or separately, reduced the  
197 generation of ROS but not mROS after challenge with *S. uberis* ( $P < 0.05$ ; Fig 6A). The  
198 bacterial counts of *S. uberis* in MECs were significantly higher in the inhibitor-treated

199 groups ( $P < 0.05$ ) (Fig 6B). We inhibited production of mROS by siECSIT to establish  
200 mROS role in regulating inflammation and anti-*S. uberis* activity. ROS and mROS  
201 levels decreased significantly after using siECSIT ( $P < 0.05$ ; Fig 6D). Similar results  
202 were observed for TNF- $\alpha$ , IL-1 $\beta$  and IL-6 expression; their levels were up-regulated  
203 after *S. uberis* infection while siECSIT reduced them (Fig 6E). The bacterial counts of  
204 *S. uberis* in MECs were significantly higher in the siECSIT treatment group (Fig 6F).  
205 These results demonstrate that mROS does play an important role against *S. uberis*  
206 infection in MECs.

207

## 208 Discussion

209 The intrusion signal (from molecules broadly shared by pathogens that could be  
210 recognized by the immune system) of intracellular bacteria captured by PRRs is  
211 crucial for host control of inflammation and pathogen proliferation [25]. TLRs are  
212 one of the most ancient, conserved components of the immune system, and have  
213 been established by our laboratory to sense and respond to *S. uberis* [3]. *S. uberis* is a  
214 kind of Gram-positive bacterium and TLR2 is the principal receptor that can sense its  
215 invasion [26]. However, TLR2 and TLR4 share the same delivery system, and current  
216 studies have not yet distinguished their exact roles in defending against *S. uberis*  
217 infection. We used TLR2<sup>-/-</sup> and TLR4<sup>-/-</sup> mice to investigate, for the first time  
218 thoroughly, the roles of these two high-correlation receptors in *S. uberis* infection.  
219 Deficiency of TLR2, but not TLR4, induced a more severe inflammatory response and  
220 tissues damage in mammary gland and bacterial viability was higher. These results

221 confirmed that TLR2 detected *S. uberis* infection, initiated the antibacterial  
222 immunological reaction and controlled the inflammatory status in mammary glands.

223 Proinflammatory cytokines, such as TNF- $\alpha$ , IL-1 $\beta$  and IL-6, are secreted following  
224 activation of TLRs and their respective downstream signaling pathways mainly in  
225 immune cells [27]. They are involved in upregulation of inflammatory reactions and  
226 play a role in regulating host defense against pathogens mediating the innate  
227 immune response. In this study, TNF- $\alpha$ , the initiating factor in the cytokine storm,  
228 increased dramatically after *S. uberis* challenging in variant mice. This change was  
229 only seen in TLR2<sup>-/-</sup> mice for IL-1 $\beta$ . No changes were observed for IL-6. These findings  
230 were consistent with previous reports that expression of TNF- $\alpha$ , IL-1 $\beta$  and IL-6 had a  
231 chronological order, and for the samples detected here, were only expressed at 24 h  
232 post-infection [28]. Compared with WT mice, in TLR2<sup>-/-</sup> mice, TNF- $\alpha$  and IL-1 $\beta$  were  
233 obviously decreased. This further demonstrated the important role of TLR2 in the  
234 interaction of *S. uberis* infection with the host. TNF- $\alpha$  levels in TLR4<sup>-/-</sup> mice had  
235 similar changes. This could be explained by the fact that inflammatory response  
236 networks are complex after infection. Positive and negative inflammatory factor  
237 feedback loops both exist in *S. uberis*-infected mammary glands. The secondary  
238 inflammation induced by initial inflammatory factors might result partly from  
239 activation of TLR4. Hence, down-regulation of TNF- $\alpha$  caused by deficiency of TLR4  
240 was not the same as that losing TLR2, which could not neutralize inflammatory  
241 response challenged by *S. uberis*.

242 Two distinct signaling pathways, the MyD88-dependent and TRIF-dependent

243 pathways, are triggered by dimerized and activated TLRs [29]. Our experiments *in*  
244 *vivo* found that MyD88 instead of TRIF was affected significantly in *S. uberis* infection,  
245 and thus confirmed that the MyD88-dependent pathway predominated in this  
246 process. This phenomenon also existed in other bacterial infections. For example,  
247 Wiersinga et al. reported it in *Burkholderia pseudomallei* infection [30]. In the  
248 MyD88-dependent pathway, MyD88 recruits IL-1 receptor-associated kinases and  
249 then phosphorylates and activates TRAF6, which in turn polyubiquinates TAK1, and  
250 induces secretion of inflammatory cytokines in our research on *S. uberis* infection *in*  
251 *vivo* and *in vitro* [3, 31]. Recently, it have been suggested that activated TRAF6  
252 translocates to the mitochondria, which leads to ECSIT ubiquitination, resulting in  
253 increased mROS generation [32]. This signaling pathway plays an important role in  
254 the innate immune response against intracellular bacteria. A recent study has also  
255 shown that ECSIT- and TRAF6-depleted macrophages have decreased levels of  
256 TLR-induced ROS and are significantly impaired in their ability to kill intracellular  
257 bacteria [13]. Sonoda et al. similarly found that estrogen-related receptor  $\alpha$  and  
258 PPAR gamma Coactivator-1  $\beta$  (PGC-1 $\beta$ ) act together as key effectors of IFN- $\gamma$ -induced  
259 mitochondrial ROS production and host defense [33]. Our study emphasizes the  
260 importance of mROS in killing bacteria. Since accumulating ROS in tissues is difficult,  
261 previous research has always detected the presence of members of the antioxidant  
262 system, such as T-AOC, SOD, MDA and UCP2, in organs to reflect production of ROS  
263 indirectly [34, 35]. Our results showed that *S. uberis* challenge caused changes in  
264 redox status of mammary glands. This indicates that the

265 TLRs/MyD88/TRAF6/ECSIT/mROS axis participated in the defense response to  
266 *S. uberis* infection.

267 The inflammatory phenomena from mammary glands involve integrated  
268 responses of all kinds of mammary cells including macrophages, PMNs, lymphocytes,  
269 MECs and even matrix cells [36]. In the past decade, we paid more attention to the  
270 defensive ability of MECs because they are the most numerous cells in the udder,  
271 and we have detected TLRs-mediated signaling pathways and secretion of more than  
272 40 cytokines [28]. In addition, we showed that *S. uberis* adhered and internalized in  
273 MECs, which establishes that MECs are one of the main target cells of *S. uberis* (data  
274 not published). Intriguingly, MECs are not real immune cells and have a distinctive  
275 response to bacterial infection. For example, we have found that the PI3K/Akt/mTOR  
276 pathway in MECs generates a positive contribution to inflammation following viable  
277 *S. uberis* challenge, which is not consistent with the usual situation in some immune  
278 cells [28]. Thus, we treated MECs with specific siRNAs targeting to TLR2 and/or TLR4  
279 and then evaluated the effect of *S. uberis* challenge on the expression of key adaptor  
280 proteins. The data confirmed that the MyD88-dependent pathway predominated in  
281 *S. uberis*-infected MECs after TLR2 activation. A similar signal transfer process was  
282 reported in macrophages infected with *Mycobacterium tuberculosis*, another  
283 Gram-positive bacterium [37]. In the present study, we were interested in whether  
284 the TLR2/MyD88/TRAF6/ECSIT axis regulated production of ROS. Suppression of  
285 TLR2, but not TLR4, reduced the level of ROS and mROS in MECs after *S. uberis*  
286 challenge. This result was further explained by the detection of UCP2, which

287 separates oxidative phosphorylation from ATP synthesis and thus improves the  
288 production of ROS and mROS [38].

289 Initially, mROS was considered to be a by-product of bio-oxidation, and its  
290 synthesis cannot be regulated. A large body of researches have established that  
291 oxidative phosphorylation in mitochondria is the main pathway for mROS production  
292 and is the main source of ROS [39]. To express catalase in mitochondria could  
293 effectively reduce the production of mROS, thereby reducing the killing effect of  
294 macrophages on pathogens, indicating that mROS is a key driver in the process of  
295 antibacterial activity [40]. Our current study showed that TLR2 regulates the  
296 generation of ROS, including mROS, during *S. uberis* infection both *in vivo* and *in vitro*  
297 [3]. We suggest that TLR2-mediated mROS are involved in *S. uberis* infection. To  
298 confirm our hypothesis, GKT137831 and NG25 were used alone or simultaneously to  
299 suppress ROS from NOX complexes and production of proinflammatory cytokines.  
300 We found that the antibacterial activity of MECs was restrained to some extent, and  
301 this established that ROS from NOX complexes and cytokines were involved in the  
302 host defensive reaction. This is consistent with our previous study [28]. Furthermore,  
303 we inhibited the synthesis of mROS by siECSIT and investigated the changes in  
304 inflammation and the effect of reducing mROS on bacterial viability. The bacterial  
305 counts of *S. uberis* were significantly higher in the siECSIT treatment group. These  
306 results demonstrate that TLR2-mediated mROS are a key factor against *S. uberis*  
307 infection in MECs.

308 In conclusion, mROS participate in the host response against *S. uberis* infection,

309 and TLR2 is involved in sensing *S. uberis* invasion and controlling mROS production  
310 by regulating expression of TRAF6 and ECSIT. Additionally, the function of mROS  
311 against *S. uberis* infection probably relies on their ability to regulate cytokine levels,  
312 thereby controlling the level of inflammation. This study increased our  
313 understanding of the molecular defense mechanisms in *S. uberis* mastitis, and  
314 provides theoretical support for the development of prophylactic strategies for this  
315 critical disease.

316

## 317 **Materials and methods**

### 318 **Bacterial strain, cell culture and treatment**

319 *S. uberis* 0140J (American Type Culture Collection, Manassas, VA, USA) was  
320 inoculated into Todd–Hewitt broth (THB) supplemented with 2% fetal bovine serum  
321 (FBS; Gibco, USA) at 37°C in an orbital shaker to mid-log phase (OD<sub>600</sub> 0.4–0.6). MECs  
322 (American Type Culture Collection) were incubated in Dulbecco’s modified Eagle’s  
323 medium (DMEM) with 10% FBS and plated at 80% confluence in 6-well cell culture  
324 cluster. After culture in serum-free DMEM for 4 h, the monolayer was treated with 40  
325 nM NG25 (inhibitor of TGFβ-activated kinase 1; TAK1: Invitrogen, Carlsbad, CA, USA)  
326 for 24 h; 4 μM MK2206 (inhibitor of NADPHase: Selleck Chemicals, Houston, TX, USA)  
327 for 24 h; or transfected with 50 nM siTLR2 or/and siTLR4 for 72 h. SiECSIT with 20 nM  
328 were performed for 48 h using Lipofectamine 3000 reagent (Invitrogen) . The  
329 sequences of siRNA were designed and listed as follows. siTLR2:  
330 GTCCAGCAGAATCAATACA; siTLR4: CAATCTGACGAACCTAGTA; siECSIT:

331 GGTCACCCGATTCAAGAA. The treated cells were infected with *S. uberis* at a  
332 multiplicity of infection (MOI) of 10 for 2 or 3 h at 37°C. The supernatant and cells  
333 were collected separately and stored at –80 °C until use.

334

### 335 **Mice and treatment**

336 Mice, including wild-type C57BL/6 (WT-B6), wild-type C57BL/10 (WT-B10), TLR2<sup>-/-</sup>  
337 (C57BL/6) and TLR4<sup>-/-</sup> (C57BL/10), aged 6–8 weeks were purchased from Nanjing  
338 Biomedical Research Institute of Nanjing University (Nanjing, China) and bred under  
339 specific pathogen-free conditions in the Nanjing Agricultural University Laboratory  
340 Animal Center. All experimental protocols were approved by the Regional Animal  
341 Ethics Committee and in compliance with Animal Welfare Act regulations as well as  
342 the Guide for the Care and Use of Laboratory Animals.

343 Seventy-two hours after parturition, all experimental groups of female mice were  
344 infused with 50 µL *S. uberis* according to the number of complex infections (MOI = 10)  
345 into the left 4 (L4) and right 4 (R4) teats. The animals in the control groups were  
346 infused with same volume of phosphate-buffered saline (PBS). The offspring were  
347 weaned 1 h prior to experimental infusion. All mice were killed 24 h post-infusion.  
348 The mammary glands and serum were aseptically collected and stored at –80°C.

349 Mammary gland was fixed in 10% neutral buffered formalin. Sections of 5 µm  
350 thickness were stained with hematoxylin and eosin. Mammary gland tissues were  
351 weighed and homogenized with sterile PBS (1:5, W/V) on ice. After centrifuged at  
352 500 *g* at 4°C for 40 min, the supernatant was centrifuged again. The second



353 supernatant was collected and stored at  $-80^{\circ}\text{C}$  until assayed.

354

### 355 **Histological observation and immunohistochemistry**

356 The mammary tissue fixed in 10% neutral buffered formalin was trimmed and  
357 flushed in water for at least for 4 h, and then dehydrated in alcohol solutions ranging  
358 from 75% to 100%, with 5% increase at 1 h intervals. After soaking in xylene, the  
359 tissues were embedded in wax for 3 h at  $60^{\circ}\text{C}$ . Slices (5  $\mu\text{m}$  thick) were cut and  
360 stained with hematoxylin and eosin. The histological changes including PMN  
361 infiltration, bleeding and degeneration, and adipose tissue loss were analyzed by  
362 light microscopy (BH2; Olympus, Tokyo, Japan) at a magnification of 40 $\times$ . Four  
363 sections of mammary tissue were quantified for each animal. Ten fields were  
364 randomly selected per tissue section and assigned a score of 1, 2 or 3 based on the  
365 degree of damage.

366 Immunohistochemical staining was performed as follows. Tissue sections were  
367 washed with PBS, then covered with 3%  $\text{H}_2\text{O}_2$  for 15 minutes at  $37^{\circ}\text{C}$  to inhibit  
368 further endogenous peroxidase activity. Tissue slices were blocked with 5% bovine  
369 serum albumin and incubated with antibodies against MyD88, TRAF6, ECSIT and TRIF  
370 (Cell Signaling Technology, Danvers, MA, USA), at  $4^{\circ}\text{C}$  in a humidified chamber.  
371 Overnight, biotinylated anti-rabbit IgG (Boster Bio-Technology, Wuhan, China) was  
372 incubated for 30 min at  $37^{\circ}\text{C}$ . After rehydration, the sections were incubated with  
373 avidin–biotin peroxidase complex for 40 min at  $37^{\circ}\text{C}$ . Finally, the sections were  
374 washed and bound conjugates were revealed by diaminobenzidine staining (Boster

375 Bio-Technology).

376

377 **RNA extraction and quantitative real-time polymerase chain reaction (PCR)**

378 PCR was carried out as previously described [41]. Total RNA was extracted by TRIzol  
379 reagent (TaKaRa, Dalian, China). Corresponding cDNA was obtained using reverse  
380 transcriptase and Oligo (dT) 18 primer (TaKaRa). An aliquot of the cDNA was mixed  
381 with 25  $\mu$ L SYBR<sup>®</sup> Green PCR Master Mix (TaKaRa) and 10 pmol of each specific  
382 forward and reverse primer. All mixed systems were analyzed in an ABI Prism 7300  
383 Sequence Detection System (Applied Biosystems, Waltham, MA, USA). Fold changes  
384 were calculated as  $2^{-\Delta\Delta Ct}$ . All primer sequences (Table S1) were synthesized by  
385 Invitrogen Biological Company (Shanghai, China).

386

387 **Total protein extraction and western blotting**

388 Cells were washed twice in 2 mL ice-cold PBS and collected in an Eppendorf tube  
389 (gently scraped by a rubber policeman) after being lysed on ice for 20 min in lysis  
390 buffer (Beyotime, Nantong, China). Extracts with equal amounts of proteins were  
391 solubilized by SDS sample buffer (BioRad, California, USA), separated by SDS-PAGE,  
392 and transferred to polyvinylidene difluoride membranes (Millipore, Bedford, MA,  
393 USA). The membranes were incubated with corresponding polyclonal antibodies:  
394 anti-MyD88, anti-TRAF6, anti-ECSIT anti-TRIF, and anti-GAPDH. The signals were  
395 detected by an ECL western blot analysis system (Tanon, Shanghai, China). Analysis of  
396 bands was quantified with Image J software (NIH, Bethesda, MD, USA).

397

#### 398 **Measurement of ROS and mROS**

399 EpH4-Ev cells were incubated in dichloro-dihydrofluorescein diacetate (10  $\mu$ M, 30  
400 min) (Beyotime, Nantong, China) or MitoSOX (5  $\mu$ M, 20 min) (Thermo, Waltham, MA,  
401 USA) at 37°C, washed three times in PBS and detached. The cells were centrifuged at  
402 400 *g* for 5 min, resuspended in PBS, and immediately analyzed by flow cytometry  
403 using FACSCanto (BD, New Jersey, USA). Ten thousand cells per sample were  
404 analyzed using CellQuest Pro acquisition and analysis software.

405

#### 406 **Assay of TNF- $\alpha$ , IL-1 $\beta$ , and IL-6 by ELISA**

407 The levels of TNF- $\alpha$ , IL-1 $\beta$ , and IL-6 in mammary glands and EpH4-Ev cells were  
408 measured by ELISA (Rigor Bioscience, Beijing, China). Prepared standards (50  $\mu$ L),  
409 and antibodies (40  $\mu$ L) labeled with enzyme (10  $\mu$ L) were reacted for 60 min at 37°C  
410 and the plate was washed five times. Chromogen solutions A (50  $\mu$ L) and B (50  $\mu$ L)  
411 were added and incubated for 10 min at 37°C. Stop solution (50  $\mu$ L) was added and  
412 optical density value was measured at 450 nm within 10 min. Qualitative differences  
413 or similarities between the control and experimental groups were consistent  
414 throughout the study.

415

#### 416 **Detection of NAGase, T-AOC, SOD, MDA and UCP2**

417 The activities or levels of *N*-acetyl- $\beta$ -D-glucosaminidase (NAGase), total antioxidant  
418 capacity (T-AOC), superoxide dismutase (SOD), malondialdehyde (MDA) and

419 uncoupling protein 2 (UCP2) were determined using commercial kits purchased from  
420 Nanjing Jiancheng Bioengineering Institute (China).

421

#### 422 **Viable bacterial count assay**

423 Viable bacteria were enumerated as colony-forming units (CFU) on THB agar. The  
424 mammary glands were aseptically homogenized with sterile PBS (1:5, W/V). The  
425 supernatants were spread on plates. CFUs were counted by the spread plate method  
426 after incubation for 12 h at 37°C.

427 MECs and MECs with siECSIT were incubated in DMEM with 10% FBS and plated at  
428 80% confluence in 6-well plates. After culture in serum-free DMEM for 4 h, at  
429 mid-exponential phase ( $OD_{600}$  0.4–0.6), *S. uberis*-infected cells were washed 3 times  
430 with PBS containing 100 mg/mL gentamicin, followed by gentamicin-free PBS. Cells  
431 were pelleted at 1.4 *g* for 10 min. The same number of cells were lysed with sterile  
432 triple distilled water, and CFUs were counted by the spread plate method after  
433 incubation for 12 h at 37°C.

434

#### 435 **Statistical analysis**

436 Results were analyzed using GraphPad Prism 5.0 software (GraphPad Software Inc.,  
437 La Jolla, CA, USA). Data were expressed as means standard error of the mean (SEM).  
438 Differences were evaluated by one-way analysis of variance followed by post-hoc  
439 tests. Significant differences were considered at  $P < 0.05$ .

#### 440 **Supporting information**

441 **S1 Table. Oligonucleotide sequences used for RT-qPCR.**

442 **S1 Fig. TLR2/4 mediates the NAGase activity after challenge with *S. uberis* in the**  
443 **supernatant of MECs.**

444 **S2 Fig. TLR2/4 mediates the inflammatory response after challenge with *S. uberis* in**  
445 **MECs.**

446 **S3 Fig. The suppression of mROS reduces the inflammation factors after challenge**  
447 **with *S. uberis* in the supernatant of MECs.**

448 **S4 Fig. The protein expression of ECSIT were determined by Western blot after**  
449 **using siECSIT in MECs.**

450

## 451 **Acknowledgments**

452 This project was supported by grants from the National Natural Science Foundation  
453 of China (No. 31672515), the Key Project of Inter - governmental International  
454 Scientific and Technological Innovation Cooperation (No.2018YFE0102200), and the  
455 Project Funded by the Priority Academic Program Development of Jiangsu Higher  
456 Education Institutions. We thank International Science Editing  
457 (<http://www.internationalscienceediting.com>) for editing this manuscript.

458

## 459 **Author Contributions**

460 Conceived and designed the experiments: Bin Li, Zhixin Wan. Performed the  
461 experiments: Bin Li, Zhixin Wan, Zhenglei Wang. Analyzed the data: Bin Li, Zhixin  
462 Wan, Jiakun Zuo, Yuanyuan Xu. Contributed reagents/materials/analysis tools: Xiangan

463 Han, Vanhnaseng Phouthapane, Jinfeng Miao. Wrote the paper: Bin Li, Zhixin Wan,

464 Jinfeng Miao.

465

## 466 **Competing interests**

467 The authors have declared that no competing interests exist.

468

## 469 **References**

470 [1] Bergonier D, Crémoux R D, Rupp R, et al. Mastitis of dairy small ruminants[J]. Veterinary Research,

471 2003, 34(5):689-716.

472 [2] Pearson L J, Williamson J H, Turner S A, et al. Peripartum infection with *Streptococcus uberis* but

473 not coagulase-negative *staphylococci* reduced milk production in primiparous cows[J]. Journal of

474 Dairy Science, 2013, 96(1):158-164.

475 [3] Miao J, Zheng L, Zhang J, et al. The effect of taurine on the toll-like receptors/nuclear factor kappa

476 B (TLRs/NF-KB) signaling pathway in *Streptococcus uberis*-induced mastitis in rats[J]. International

477 Immunopharmacology, 2011, 11(11):0-1746.

478 [4] Takeuchi O , Akira S . Pattern Recognition Receptors and Inflammation[J]. Cell, 2010, 140(6):0-820.

479 [5] Kawai T , Akira S . TLR signaling[J]. Cell Death & Differentiation, 2007, 13(1):24-32.

480 [6] Strandberg Y, Gray C, Vuocolo T, et al. Lipopolysaccharide and lipoteichoic acid induce different

481 innate immune responses in bovine mammary epithelial cells[J]. Cytokine, 2005, 31(1):0-86.

482 [7] Ibeaghaawemu E M , Ibeagha A E , Bannerman D D , et al. Bacterial lipopolysaccharide induces

483 increased expression of toll-like receptor (TLR) 4 and downstream TLR signaling molecules in

484 bovine mammary epithelial cells[J]. Veterinary Research, 2008, 39(2):11.

- 485 [8] Lu Sun, Yan-Li Liu, Fang Ye, et al. Free fatty acid-induced H<sub>2</sub>O<sub>2</sub> activates TRPM2 to aggravate  
486 endothelial insulin resistance via Ca<sup>2+</sup>-dependent PERK/ATF4/TRB3 cascade in obese mice[J]. Free  
487 Radical Biology and Medicine, 2019, 143(2019):288-299.
- 488 [9] N. Rocco-Machado, D. Cosentino-Gomes, M.T. Nascimento, et al. Leishmania amazonensis ferric  
489 iron reductase (LFR1) is a bifunctional enzyme: Unveiling a NADPH oxidase activity[J]. Free  
490 Radical Biology and Medicine, 2019, 143(2019):341-353.
- 491 [10] West A P, Shadel G S, Ghosh S. Mitochondria in innate immune responses[J]. Nature reviews  
492 immunology, 2011, 11(6):389-402.
- 493 [11] Blaser H, Dostert C, Mak T W, et al. TNF and ROS Crosstalk in Inflammation[J]. Trends in Cell  
494 Biology, 2016, 26(4):249-261.
- 495 [12] Hughes G, Murphy M, Ledgerwood E. Mitochondrial reactive oxygen species regulate the  
496 temporal activation of nuclear factor  $\kappa$  B to modulate tumour necrosis factor-induced apoptosis:  
497 evidence from mitochondria-targeted antioxidants[J]. Biochemical Journal, 2005, 389(1):83.
- 498 [13] West A P, Brodsky I E, Rahner C, et al. TLR signaling augments macrophage bactericidal activity  
499 through mitochondrial ROS[J]. Nature, 2011, 472(7344):476-480.
- 500 [14] King C G , Kobayashi T , Cejas P J , et al. TRAF6 is a T cell – intrinsic negative regulator required for  
501 the maintenance of immune homeostasis[J]. Nature Medicine, 2006, 12(9):1088-1092.
- 502 [15] Rasmussen S J , Eckmann L , Quayle A J , et al. Secretion of proinflammatory cytokines by  
503 epithelial cells in response to Chlamydia infection suggests a central role for epithelial cells in  
504 chlamydial pathogenesis[J]. Journal of Clinical Investigation, 1997, 99(1):77-87.
- 505 [16] Huang K, Fingar D C. Growing knowledge of the mTOR signaling network[J]. Seminars in Cell &  
506 Developmental Biology, 2014, 36:79-90.

- 507 [17] Landskron G, Marjorie D L F, Thuwajit P, et al. Chronic Inflammation and Cytokines in the Tumor  
508 Microenvironment[J]. Journal of Immunology Research, 2014, 2014:1-19.
- 509 [18] Guo M , Zhang N , Li D , et al. Baicalin plays an anti-inflammatory role through reducing nuclear  
510 factor-  $\kappa$  B and p38 phosphorylation in *S. aureus*-induced mastitis[J]. International  
511 Immunopharmacology, 2013, 16(2):125-130.
- 512 [19] Bhatelia K, Singh K, Singh R. TLRs: Linking inflammation and breast cancer[J]. Cellular Signalling,  
513 2014, 26(11):2350-2357.
- 514 [20] West A P, Brodsky I E, Rahner C, et al. TLR signaling augments macrophage bactericidal activity  
515 through mitochondrial ROS[J]. Nature, 2011, 472(7344):476-480.
- 516 [21] Fitzgerald K A , Palsson-Mcdermott E M , Bowie A G , et al. Mal (MyD88-adaptor-like) is required  
517 for Toll-like receptor-4 signal transduction[J]. Nature, 2001, 413(6851):78-83.
- 518 [22] Wang Y , Tang Y , Teng L , et al. Association of beta-arrestin and TRAF6 negatively regulates  
519 Toll-like receptor-interleukin 1 receptor signaling.[J]. Nature Immunology, 2006, 7(2):139-147.
- 520 [23] Aoyama T, Paik Y H, Watanabe S, et al. Nicotinamide adenine dinucleotide phosphate oxidase in  
521 experimental liver fibrosis: GKT137831 as a novel potential therapeutic agent[J]. Hepatology,  
522 2012, 56(6):2316-2327.
- 523 [24] Wang Z , Zhang H , Shi M , et al. TAK1 inhibitor NG25 enhances doxorubicin-mediated apoptosis  
524 in breast cancer cells[J]. Scientific Reports, 2016, 6:32737.
- 525 [25] Zanoni I , Granucci F . Regulation and dysregulation of innate immunity by NFAT signaling  
526 downstream of pattern recognition receptors (PRRs)[J]. European Journal of Immunology, 2012,  
527 42(8):1924---1931.
- 528 [26] Richardson E T , Shukla S , Sweet D R , et al. Toll-Like Receptor 2-Dependent Extracellular



- 529 Signal-Regulated Kinase Signaling in Mycobacterium tuberculosis-Infected Macrophages Drives  
530 Anti-Inflammatory Responses and Inhibits Th1 Polarization of Responding T Cells[J]. Infection and  
531 Immunity, 2015, 83(6):2242-2254.
- 532 [27] Kubo T , Hatton R D , Oliver J , et al. Regulatory T Cell Suppression and Anergy Are Differentially  
533 Regulated by Proinflammatory Cytokines Produced by TLR-Activated Dendritic Cells[J]. The  
534 Journal of Immunology, 2004, 173(12):7249-7258.
- 535 [28] Li B, Xi P P, Wang Z L, et al. PI3K/Akt/mTOR signaling pathway participates in *Streptococcus*  
536 *uberis*-induced inflammation in mammary epithelial cells in concert with the classical TLRs/NF- $\kappa$   
537 B pathway[J]. Veterinary Microbiology, 2018, 227:101-111.
- 538 [29] Medzhitov R. Recognition of microorganisms and activation of the immune response[J]. Nature  
539 (London), 2007, 449(7164):819-826.
- 540 [30] Wiersinga W , Van d P T , White N , et al. Melioidosis: insights into the pathogenicity of  
541 *Burkholderia pseudomallei*.[J]. Nature Reviews Microbiology, 2006, 4(4):272-282.
- 542 [31] Miao J, Zhang J, Ma Z, et al. The role of NADPH oxidase in taurine attenuation of *Streptococcus*  
543 *uberis*-induced mastitis in rats[J]. International Immunopharmacology, 2013, 16(4):429-435.
- 544 [32] Flávia R.G. Carneiro, Lepelley A , Seeley J J , et al. An Essential Role for ECSIT in Mitochondrial  
545 Complex I Assembly and Mitophagy in Macrophages[J]. Cell Reports, 2018, 22(10):2654-2666.
- 546 [33] Sonoda J , Laganieri J , Mehl I R , et al. Nuclear receptor ERR  $\alpha$  and coactivator PGC-1  $\beta$  are  
547 effectors of IFN- $\gamma$ -induced host defense[J]. Genes & Development, 2007, 21(15):1909-1920.
- 548 [34] Ray P , Huang B W , Tsuji Y . Reactive oxygen species (ROS) homeostasis and redox regulation in  
549 cellular signaling[J]. Cell Signal, 2012, 24(5):981-990.
- 550 [35] Arsenijevic D , Onuma H , Pecqueur C , et al. Disruption of the uncoupling protein-2 gene in mice

551 reveals a role in immunity and reactive oxygen species production[J]. *Nature Genetics*, 2000,  
552 26(4):435-439.

553 [36] Bhatelia K, Singh K, Singh R. TLRs: Linking inflammation and breast cancer[J]. *Cellular Signalling*,  
554 2014, 26(11):2350-2357.

555 [37] Fremont C M , Yermeev V , Nicolle D M , et al. Fatal *Mycobacterium tuberculosis* infection  
556 despite adaptive immune response in the absence of MyD88[J]. *Journal of Clinical Investigation*,  
557 2005, 114(12):1790-1799.

558 [38] Frédéric Bouillaud. UCP2, not a physiologically relevant uncoupler but a glucose sparing switch  
559 impacting ROS production and glucose sensing[J]. *Biochimica Et Biophysica Acta*, 2009,  
560 1787(5):377-383.

561 [39] Liu B , Cheng Y , Zhang B , et al. Polygonatum cyrtoneura lectin induces apoptosis and autophagy  
562 in human melanoma A375 cells through a mitochondria-mediated ROS - p38 - p53 pathway[J].  
563 *Cancer Letters*, 2009, 275(1):0-60.

564 [40] Juan M E , Wenzel U , Daniel H , et al. Resveratrol Induces Apoptosis through ROS-Dependent  
565 Mitochondria Pathway in HT-29 Human Colorectal Carcinoma Cells[J]. *Journal of Agricultural and*  
566 *Food Chemistry*, 2008, 56(12):4813-4818.

567 [41] Dai B, Zhang J, Liu M, et al. The role of Ca<sup>2+</sup> mediated signaling pathways on the effect of taurine  
568 against *Streptococcus uberis* infection[J]. *Veterinary Microbiology*, 2016, 192:26-33.

569

570

571

572

573

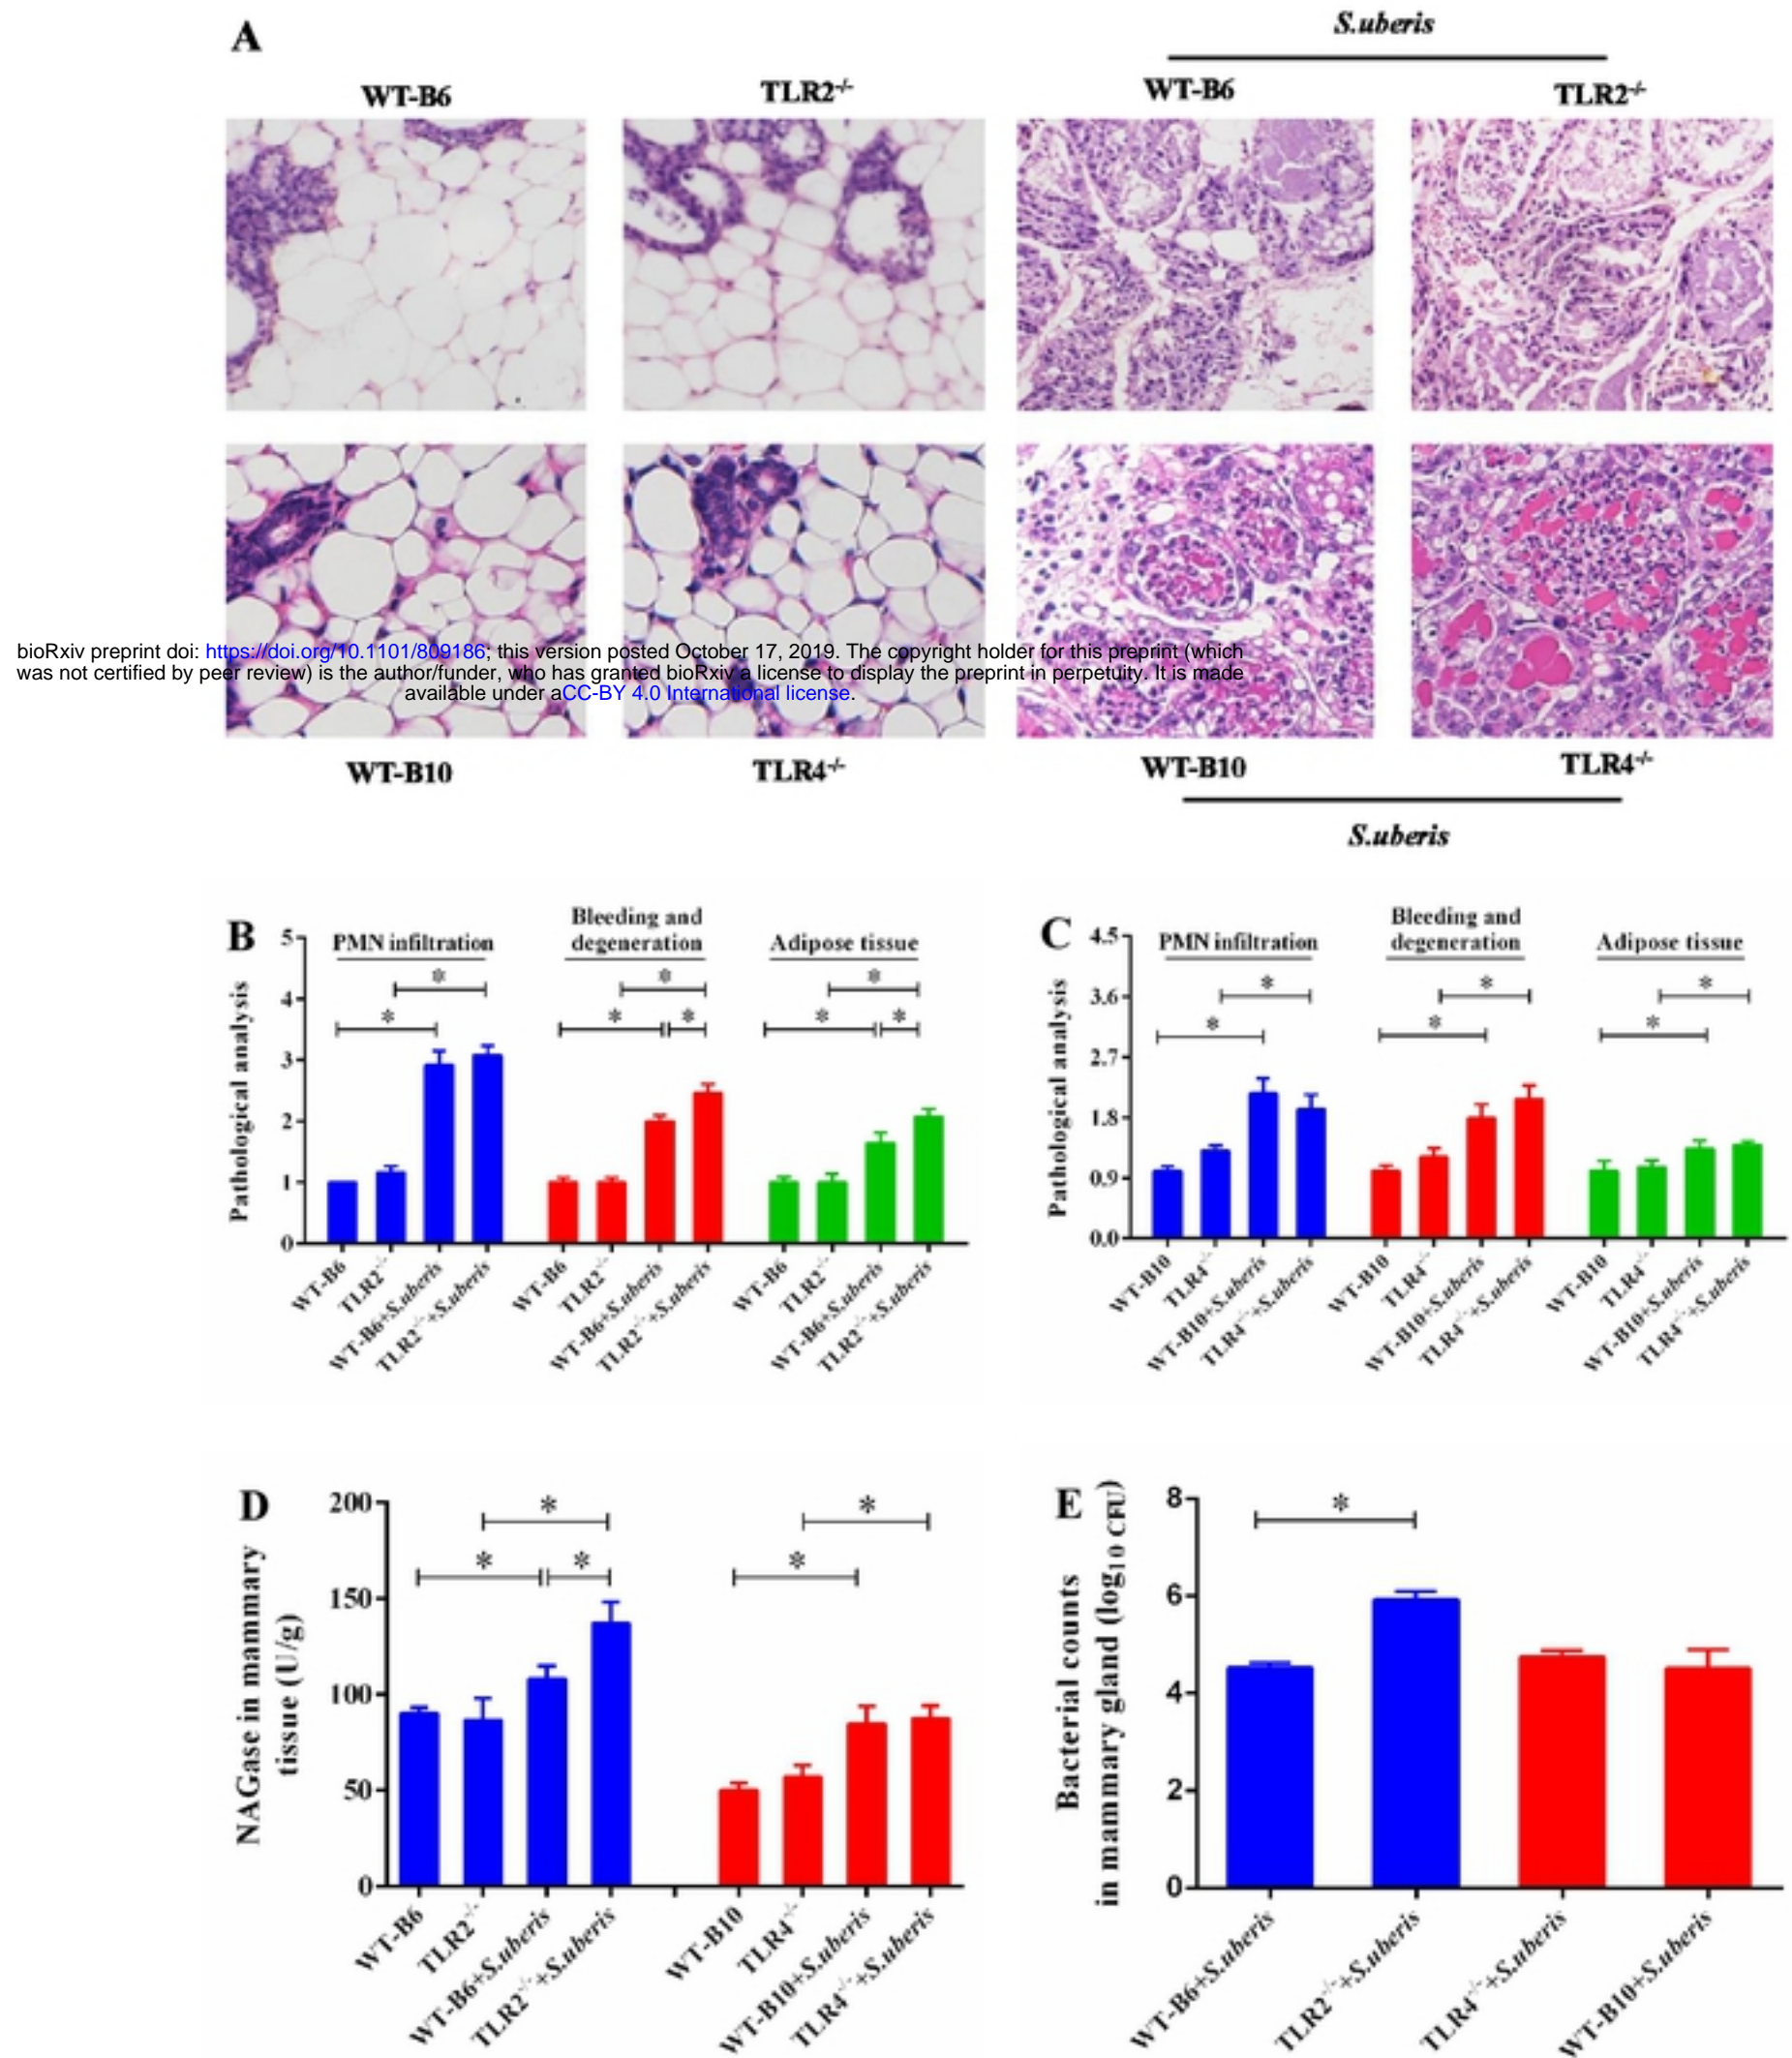

**Fig 1. TLR2 mediates tissue damage and anti-*S. uberis* infection in mammary gland. (A, B, C)** Mammary glands were stained through hematoxylin and eosin, and the bleeding and degeneration, PMN infiltration, adipose tissue were analyzed by light microscopic. (D) NAGase activity was analyzed in mammary glands. (E) Viable bacteria was counted via the plate with THB agar medium. Data are presented as the means  $\pm$  SEM (n=6). \*( $P < 0.05$ ) = significantly different between the indicated groups.

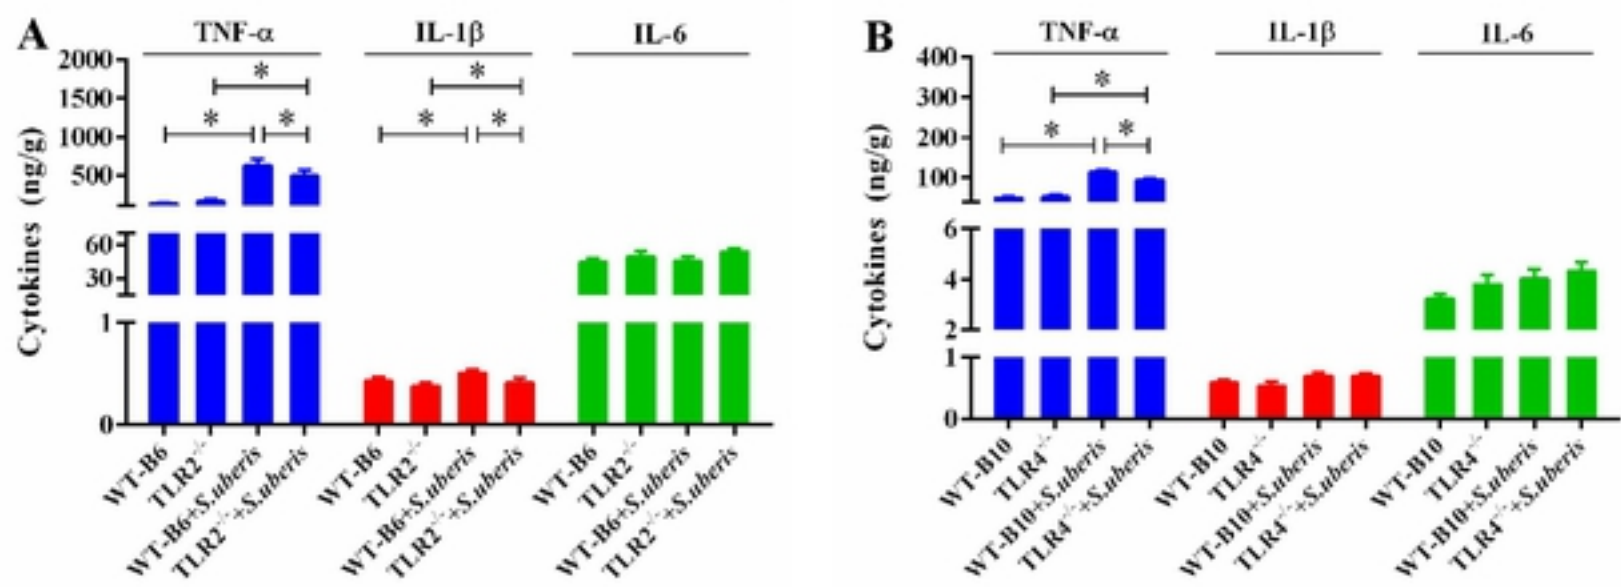

**Fig 2. TLR2 and TLR4 deficiency affect the secretion of cytokines in *S.uberis* infection. (A, B)** The protein expression of TNF- $\alpha$ , IL-1 $\beta$  and IL-6 were determined by ELISA in mammary glands. Data are presented as the means  $\pm$  SEM (n=6). \*( $P < 0.05$ ) = significantly different between the indicated groups.

bioRxiv preprint doi: <https://doi.org/10.1101/809186>; this version posted October 17, 2019. The copyright holder for this preprint (which was not certified by peer review) is the author/funder, who has granted bioRxiv a license to display the preprint in perpetuity. It is made available under aCC-BY 4.0 International license.



bioRxiv preprint doi: <https://doi.org/10.1101/809186>; this version posted October 17, 2019. The copyright holder for this preprint (which was not certified by peer review) is the author/funder, who has granted bioRxiv a license to display the preprint in perpetuity. It is made available under aCC-BY 4.0 International license.

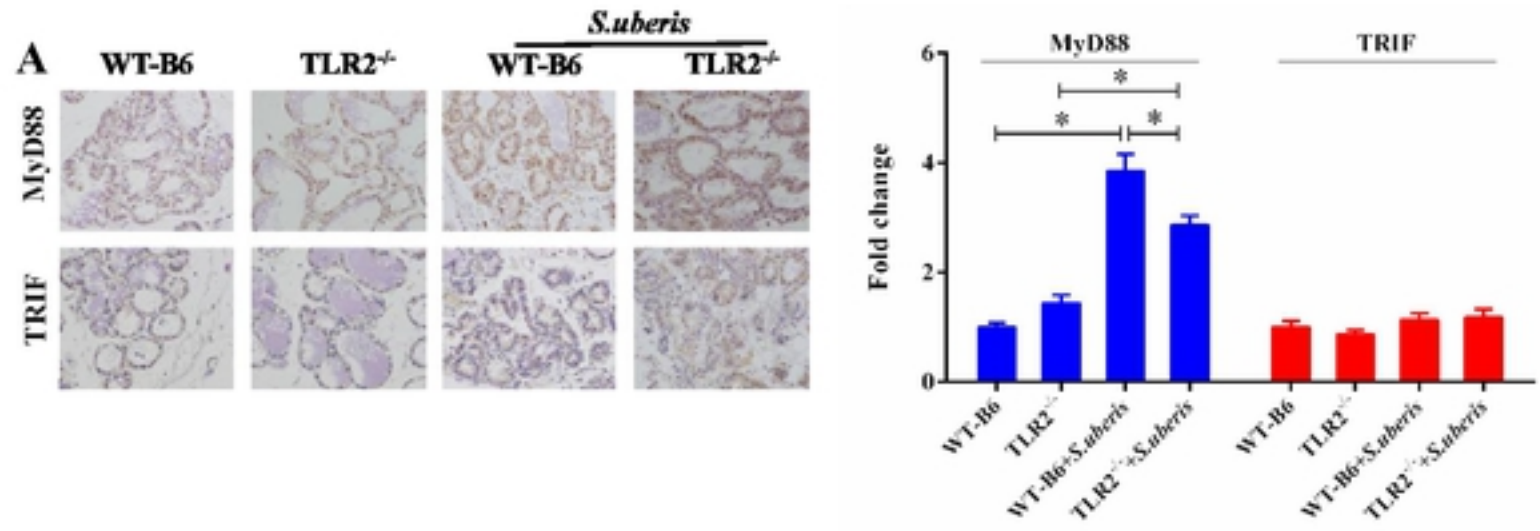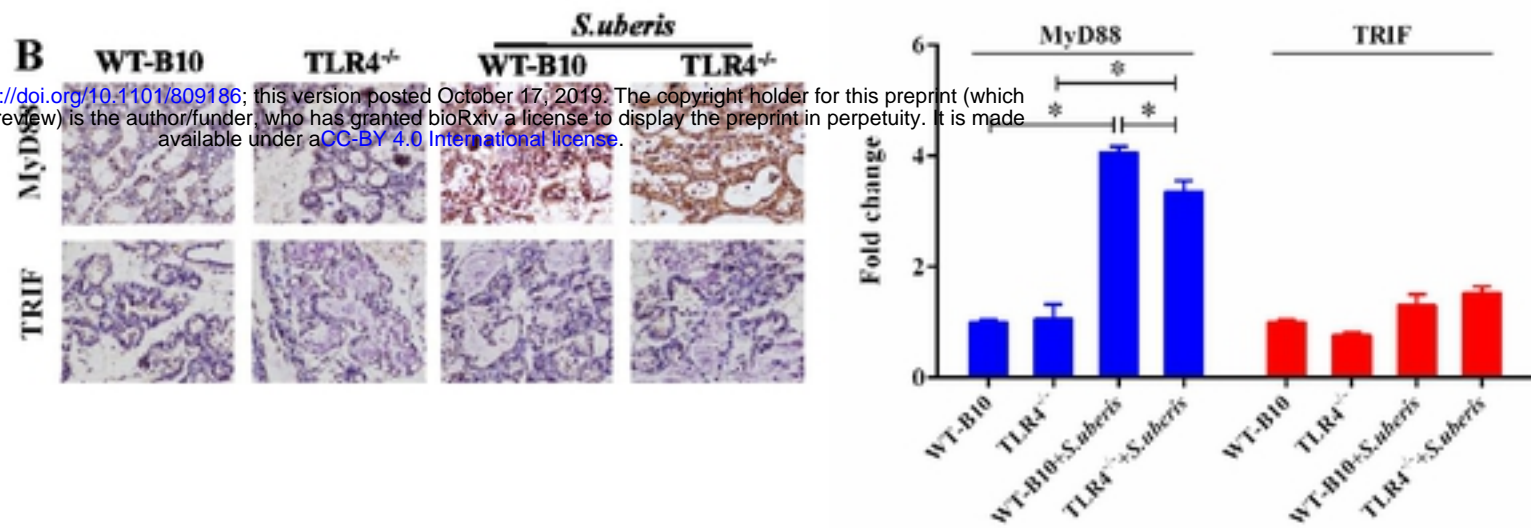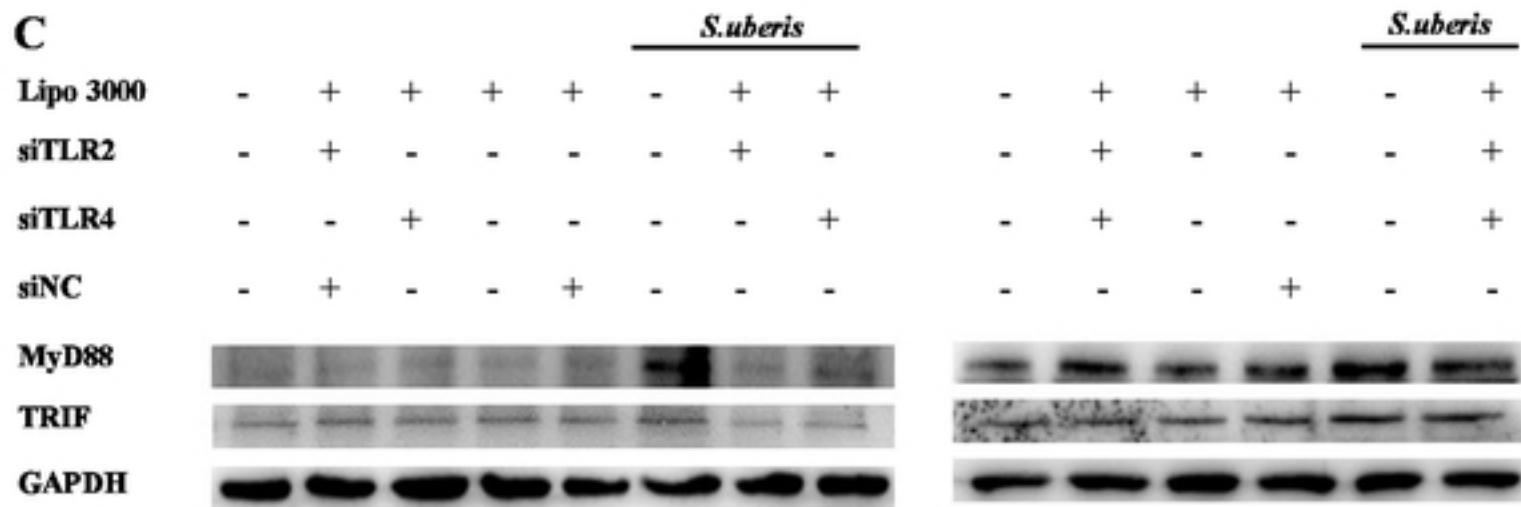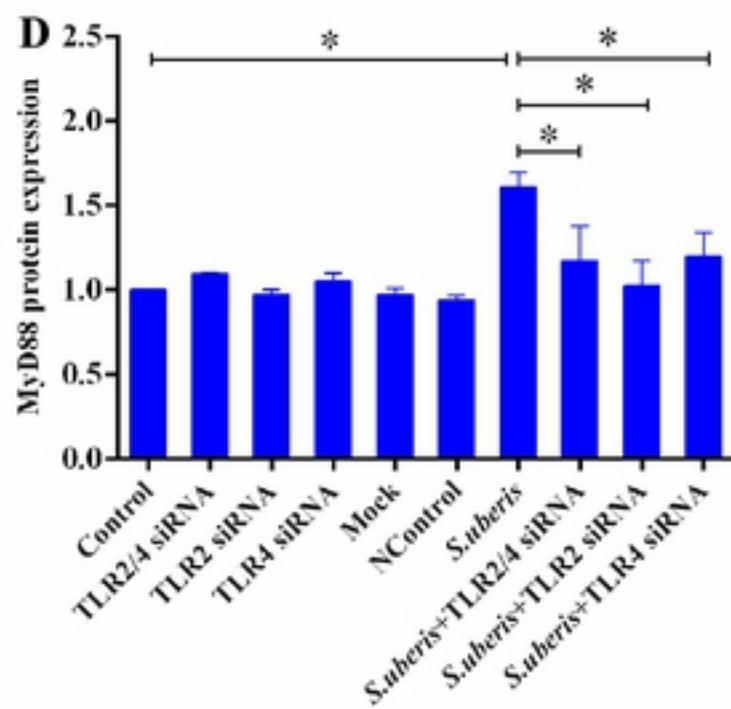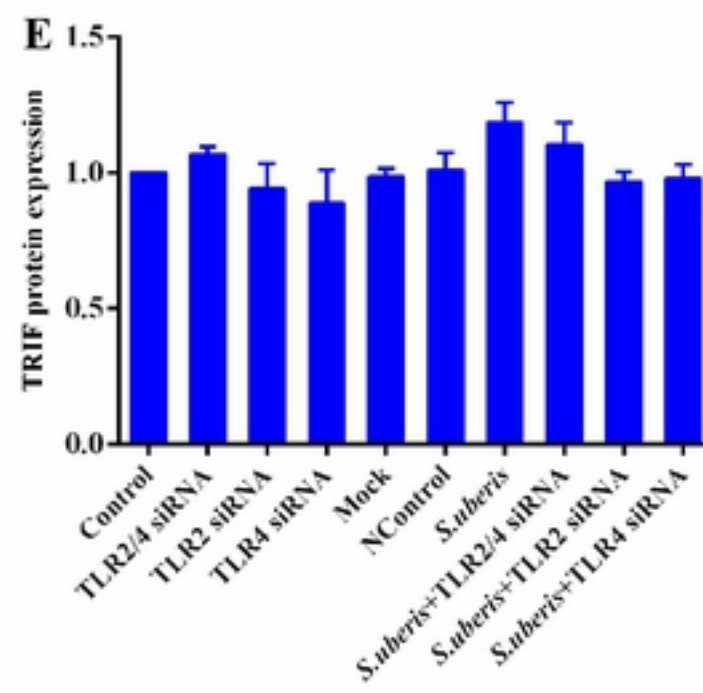

**Fig 3. MyD88 dependent pathway predominates in *S. uberis* infection.** (A, B) Immunohistochemistry was used to analyze the expression of MyD88 and TRIF in mammary glands. Data are presented as the means  $\pm$  SEM (n=6).  $*(P < 0.05)$  = significantly different between the indicated groups. (C, D, E) The protein expression of MyD88 and TRIF were determined by Western blot in MECs. Data are presented as the means  $\pm$  SEM (n=3).  $*(P < 0.05)$  = significantly different between the indicated groups.

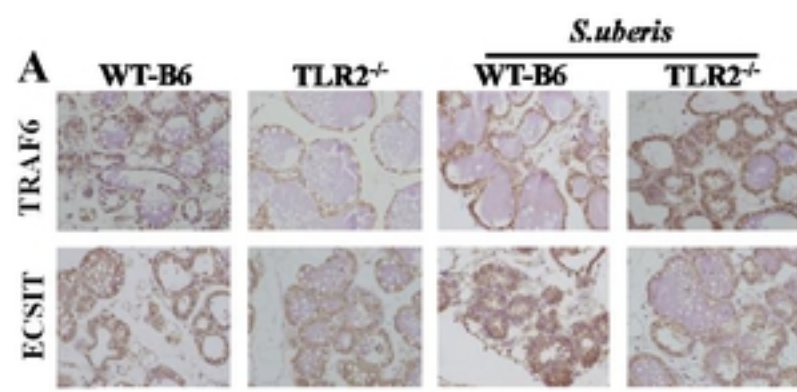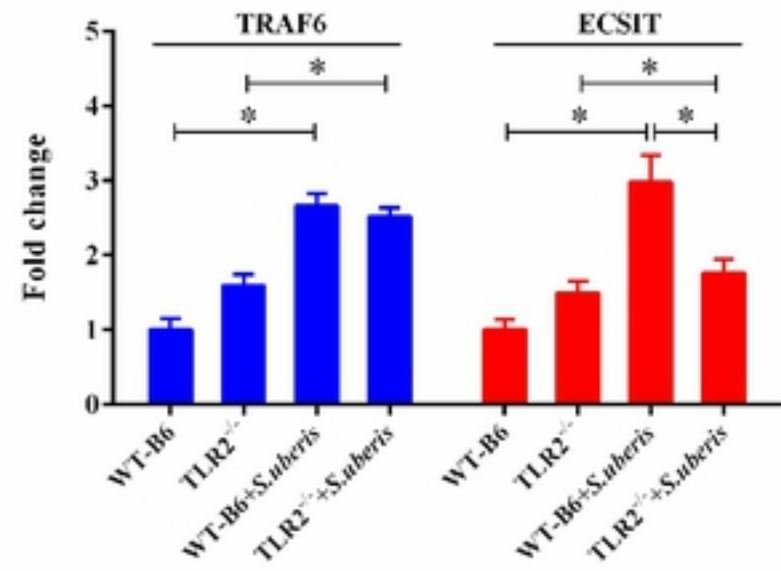

bioRxiv preprint doi: <https://doi.org/10.1101/809186>; this version posted October 17, 2019. The copyright holder for this preprint (which was not certified by peer review) is the author/funder, who has granted bioRxiv a license to display the preprint in perpetuity. It is made available under aCC-BY 4.0 International license.

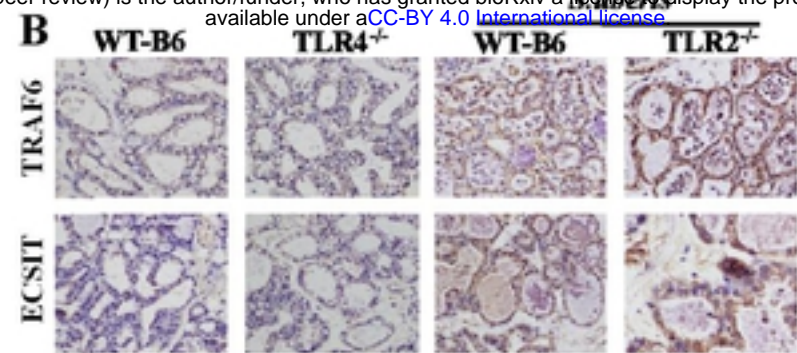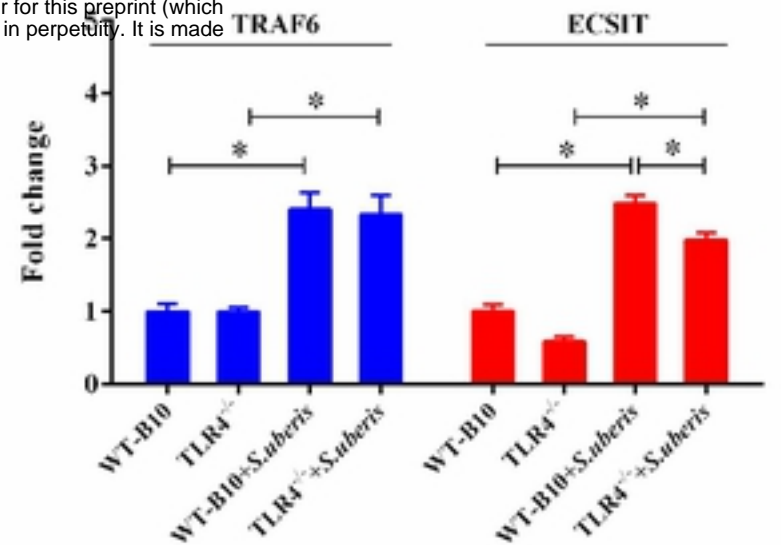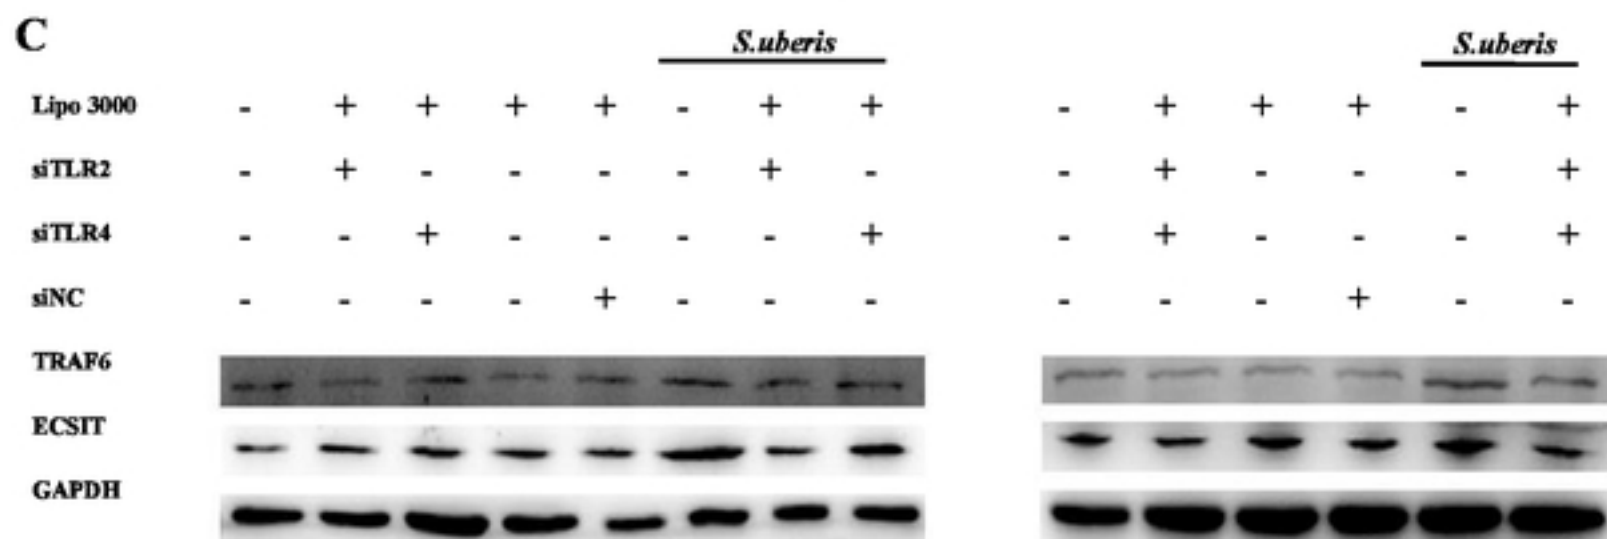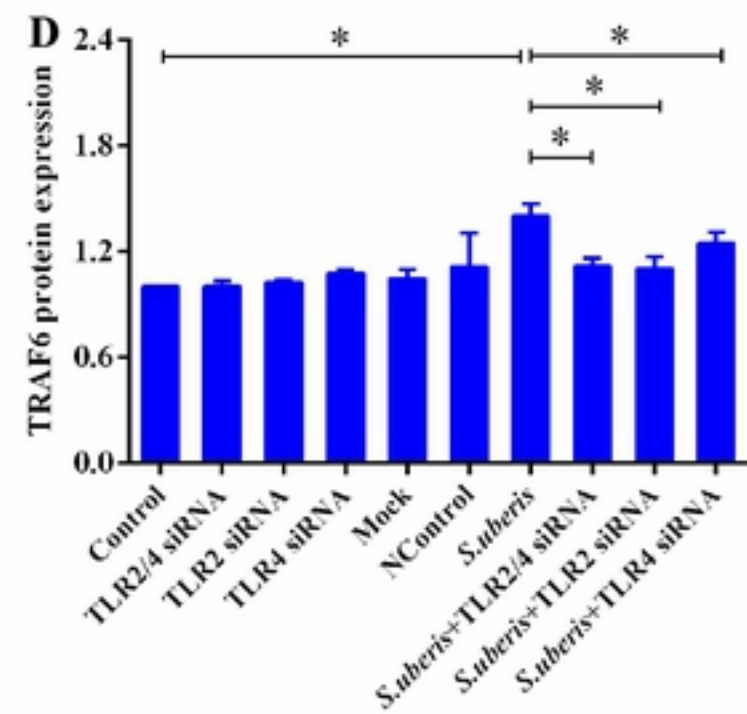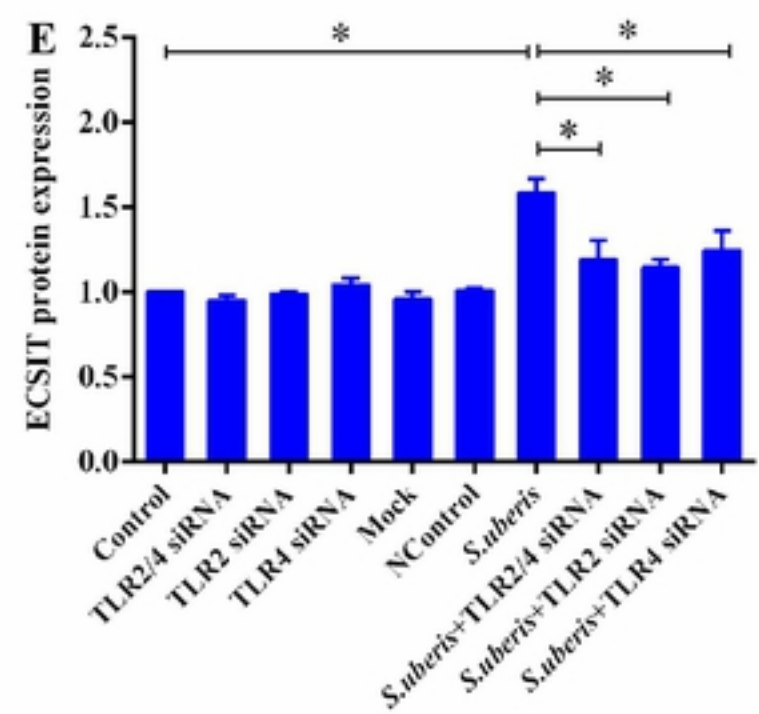

**Fig 4. TRAF6 and ECSIT participate in sensing signal from TLRs in *S. uberis* infection.** (A, B) Immunohistochemistry was used to analyze the expression of TRAF6 and ECSIT in mammary glands. Data are presented as the means  $\pm$  SEM (n=6).  $*(P < 0.05)$  = significantly different between the indicated groups. (C, D, E) The protein expression of TRAF6 and ECSIT were determined by Western blot in MECs. Data are presented as the means  $\pm$  SEM (n=3).  $*(P < 0.05)$  = significantly different between the indicated groups.



bioRxiv preprint doi: <https://doi.org/10.1101/209186>; this version posted October 17, 2019. The copyright holder for this preprint (which was not certified by peer review) is the author/funder, who has granted bioRxiv a license to display the preprint in perpetuity. It is made available under aCC-BY 4.0 International license.

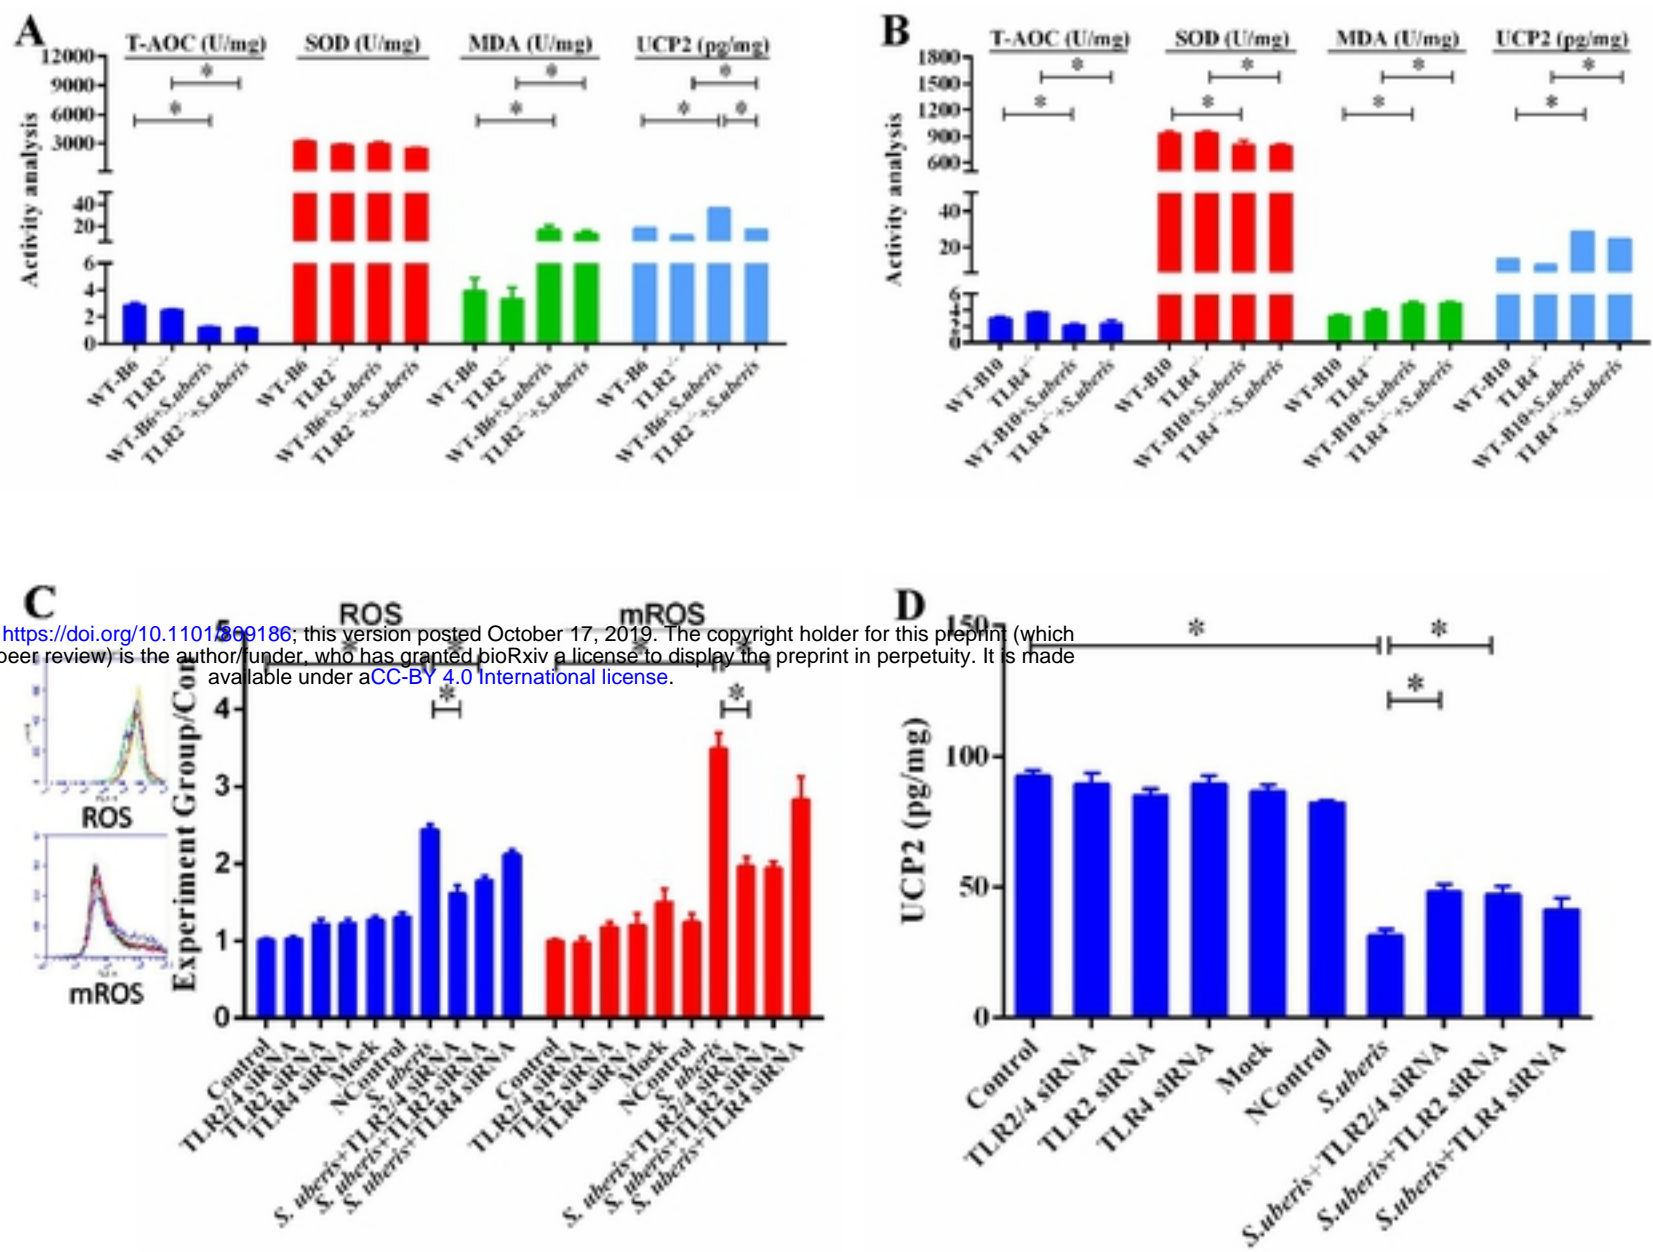

**Fig 5. TLRs mediate redox status of mammary glands during *S. uberis* infection.** (A, B) The protein expression of T-AOC, SOD, MDA and UCP2 were determined by kits in mammary glands. Data are presented as the means  $\pm$  SEM (n=6). \*( $P < 0.05$ ) = significantly different between the indicated groups. (C) CellQuest Pro acquisition and analysis software analyzed ROS and mROS in MECs. (D) The activity of UCP2 were determined by ELISA in MECs. Data are presented as the means  $\pm$  SEM (n=3). \*( $P < 0.05$ ) = significantly different between the indicated groups.

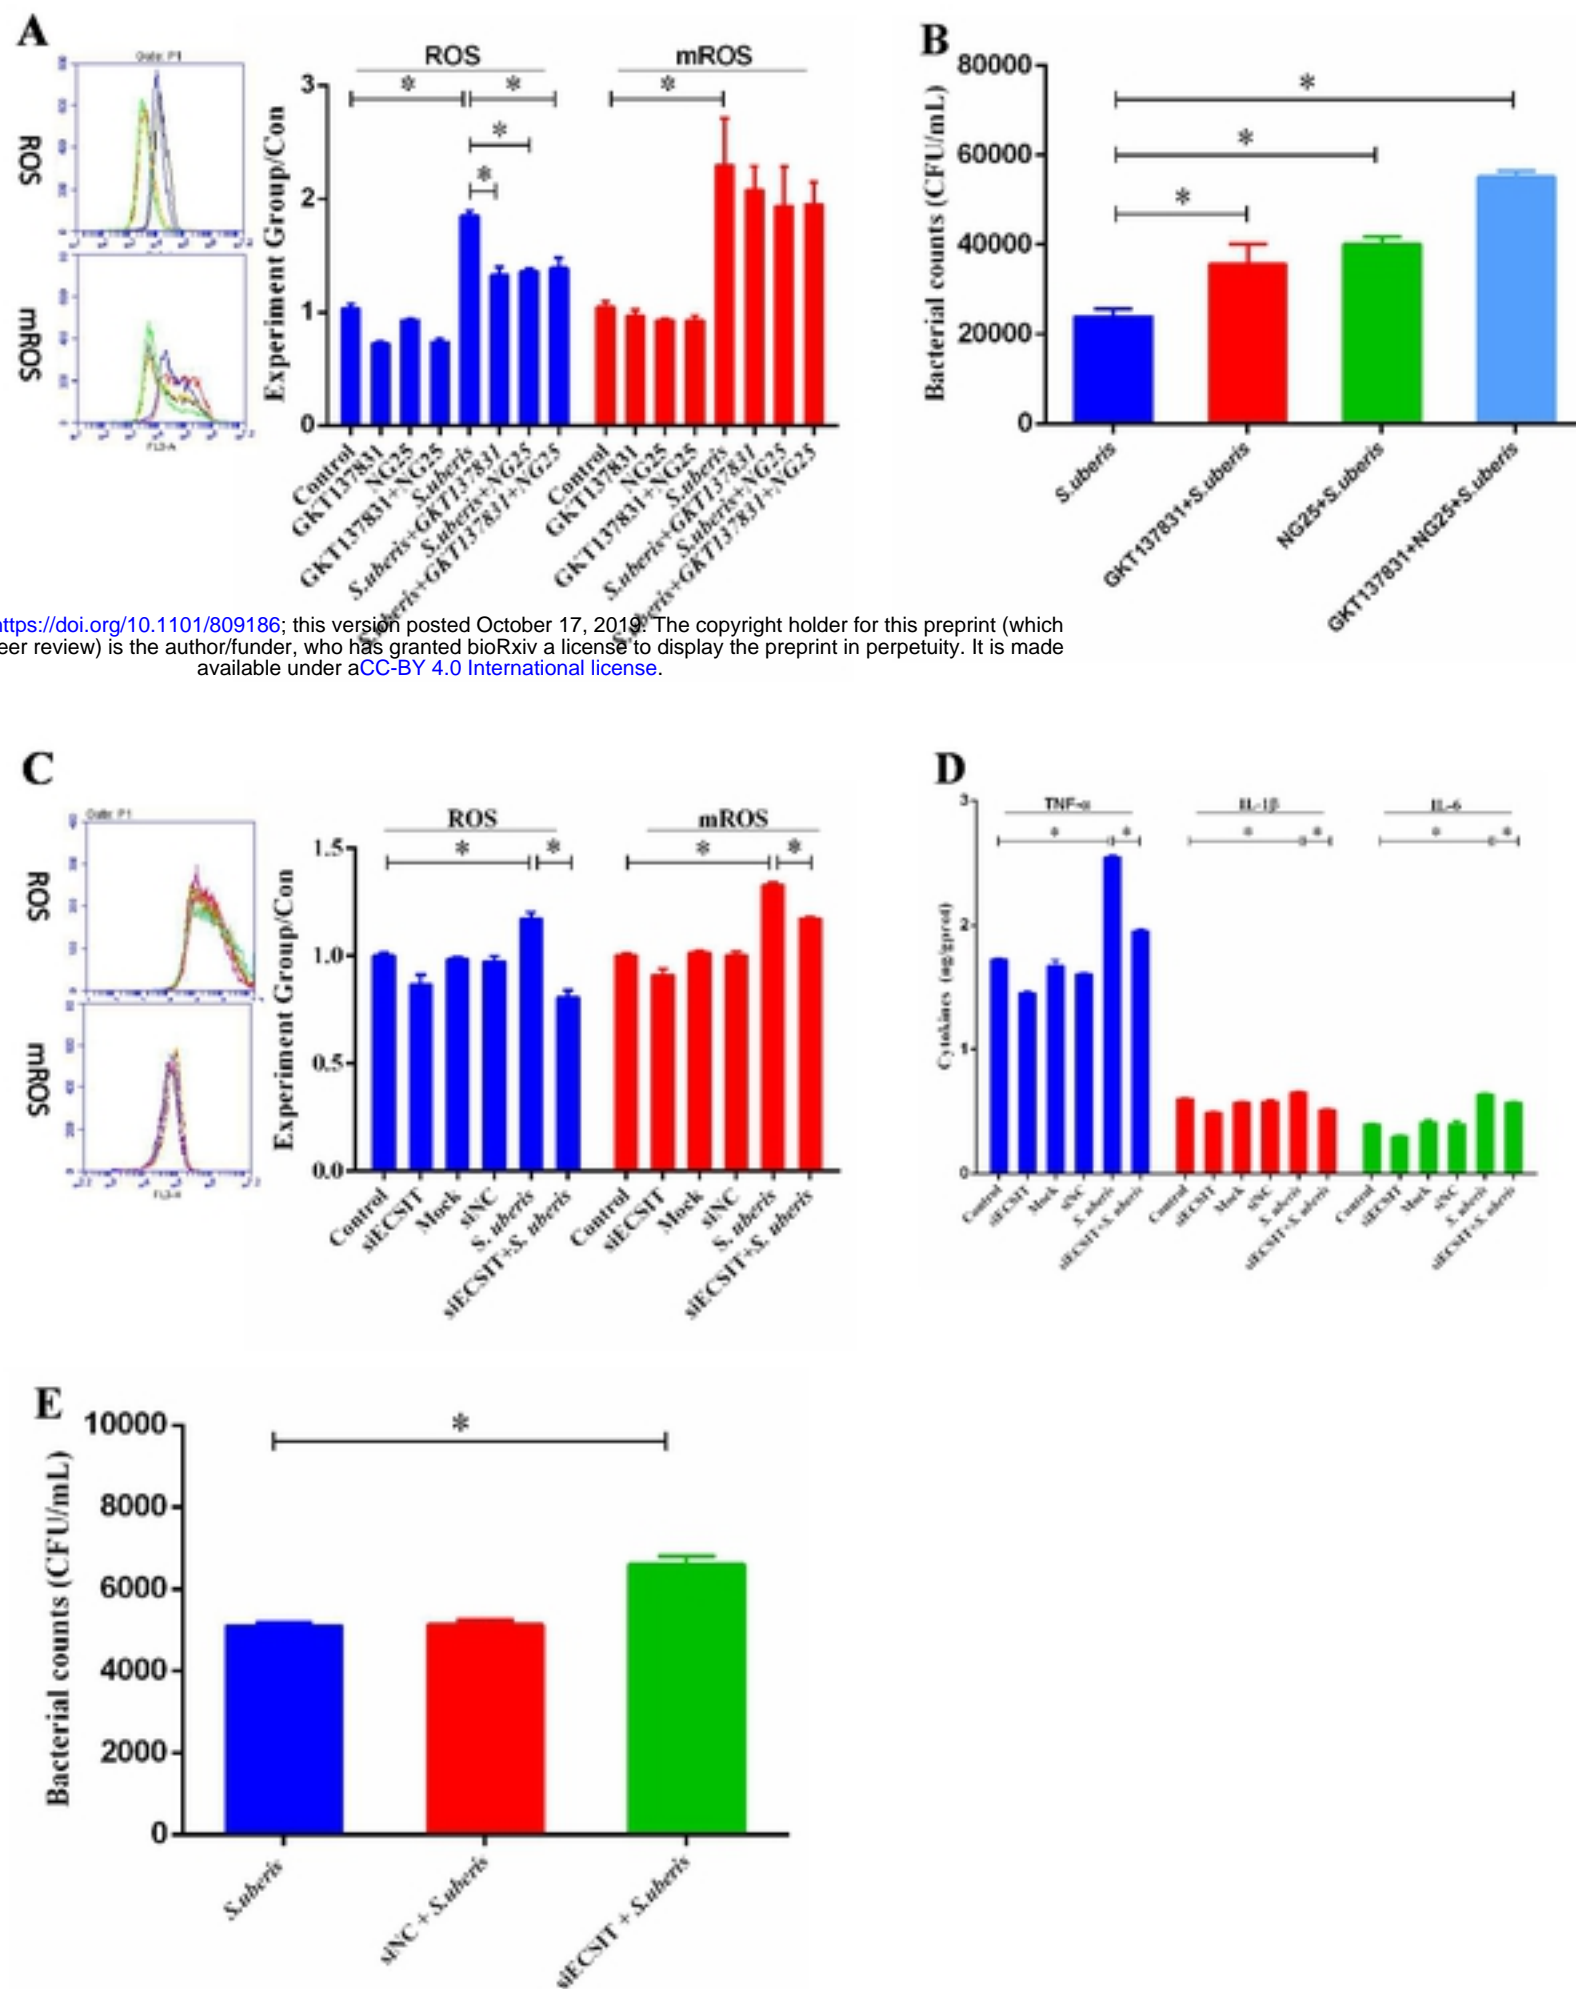

bioRxiv preprint doi: <https://doi.org/10.1101/809186>; this version posted October 17, 2019. The copyright holder for this preprint (which was not certified by peer review) is the author/funder, who has granted bioRxiv a license to display the preprint in perpetuity. It is made available under aCC-BY 4.0 International license.

**Fig 6. mROS play an important role in anti-*S. uberis* infection in MECs.** (A) The expression of ROS and mROS after using GKT137831 and NG25 simultaneously or separately during *S. uberis* infection in MECs. (B) Viable bacteria was counted via the plate with THB agar medium after using GKT137831 and NG25 simultaneously or separately during *S. uberis* infection in MECs. (C) The expression of ROS and mROS after using siECSIT in MECs. (D) The expression of TNF- $\alpha$ , IL-1 $\beta$  and IL-6 after using siECSIT in MECs. (E) Bacteria counts after using siECSIT in MECs. Data are presented as the means  $\pm$  SEM (n=3). \*( $P < 0.05$ ) = significantly different between the indicated groups.
